# Supplementary material for: Economic Analysis of Mobile Integrated Health Care Delivered by Emergency Medical Services Paramedic Teams
Source: PubMed Central journal article supplement (PMC7905495; doi:10.1001/jamanetworkopen.2021.0055), 2021-02-24
Supplement: jamanetwopen-e210055-s001.pdf [file jamanetwopen-e210055-s001.pdf]

## Supplemental Online Content

Xie F, Yan J, Agarwal G, Ferron R. Economic analysis of mobile integrated health care delivered by emergency medical services paramedic teams. *JAMA Netw Open*. 2021;4(2):e210055. doi:10.1001/jamanetworkopen.2021.0055

**eTable 1.** Demographic Characteristics of the Emergency Calls Received 2016-2019

**eTable 2.** Emergency Calls Serviced by MIH and Propensity Score Matched Calls Serviced by Ambulance

This supplemental material has been provided by the authors to give readers additional information about their work.

**eTable 1. Demographic characteristics of the emergency calls received 2016-2019**

|                             | <b>2018-19<br/>(N=56,652)</b> | <b>2017-18<br/>(N=55,523)</b> | <b>2016-17<br/>(N=52,536)</b> | <b>p value</b> |
|-----------------------------|-------------------------------|-------------------------------|-------------------------------|----------------|
| <b>Age, years</b>           |                               |                               |                               | < 0.01         |
| Mean (SD)                   | 59.2 (24.9)                   | 59.7 (24.8)                   | 60.0 (24.8)                   |                |
| <b>Gender</b>               |                               |                               |                               | 0.04           |
| Female                      | 29,555 (52.2%)                | 29,270 (52.7%)                | 27,644 (52.6%)                |                |
| Male                        | 26,699 (47.1%)                | 25,798 (46.5%)                | 24,497 (46.6%)                |                |
| NULL                        | 398 (0.7%)                    | 455 (0.8%)                    | 395 (0.8%)                    |                |
| <b>City</b>                 |                               |                               |                               | < 0.01         |
| FORT ERIE                   | 3680 (6.5%)                   | 3486 (6.3%)                   | 3071 (5.8%)                   |                |
| GLANBROOK                   | 6 (0.0%)                      | 4 (0.0%)                      | 5 (0.0%)                      |                |
| GRIMSBY                     | 2373 (4.2%)                   | 2196 (4.0%)                   | 2255 (4.3%)                   |                |
| HALDIMAND                   | 26 (0.0%)                     | 21 (0.0%)                     | 17 (0.0%)                     |                |
| HAMILTON                    | 18 (0.0%)                     | 31 (0.1%)                     | 34 (0.1%)                     |                |
| LINCOLN                     | 1916 (3.4%)                   | 2070 (3.7%)                   | 1966 (3.7%)                   |                |
| LONDON                      | 0 (0.0%)                      | 8 (0.0%)                      | 0 (0.0%)                      |                |
| NIAGARA FALLS               | 12871 (22.7%)                 | 12654 (22.8%)                 | 12208 (23.2%)                 |                |
| NIAGARA-O-T-L T             | 2007 (3.5%)                   | 2037 (3.7%)                   | 1984 (3.8%)                   |                |
| PELHAM                      | 1347 (2.4%)                   | 1286 (2.3%)                   | 1249 (2.4%)                   |                |
| PORT COLBORNE               | 2420 (4.3%)                   | 2430 (4.4%)                   | 2233 (4.5%)                   |                |
| ST CATHARINES               | 19973 (35.3%)                 | 19614 (35.3%)                 | 18327 (34.9%)                 |                |
| STONEY CREEK                | 76 (0.1%)                     | 76 (0.1%)                     | 95 (0.2%)                     |                |
| THOROLD                     | 2086 (3.7%)                   | 1996 (3.6%)                   | 1908 (3.6%)                   |                |
| WAINFLEET                   | 507 (0.9%)                    | 484 (0.9%)                    | 493 (0.9%)                    |                |
| WELLAND                     | 6485 (11.4%)                  | 6284 (11.3%)                  | 5869 (11.3%)                  |                |
| WEST LINCOLN                | 861 (1.5%)                    | 846 (1.5%)                    | 822 (1.6%)                    |                |
| <b>Month</b>                |                               |                               |                               | < 0.01         |
| Jan                         | 4,773 (8.4%)                  | 4,838 (8.7%)                  | 4,520 (8.6%)                  |                |
| Feb                         | 4,238 (7.5%)                  | 4,336 (7.8%)                  | 3,869 (7.4%)                  |                |
| Mar                         | 4,838 (8.5%)                  | 4,765 (8.6%)                  | 4,340 (8.3%)                  |                |
| Apr                         | 4,675 (8.3%)                  | 4,471 (8.1%)                  | 4,178 (8.0%)                  |                |
| May                         | 4,754 (8.4%)                  | 4,825 (8.7%)                  | 4,378 (8.3%)                  |                |
| Jun                         | 4,743 (8.4%)                  | 4,590 (8.3%)                  | 4,595 (8.7%)                  |                |
| Jul                         | 5,036 (8.9%)                  | 4,860 (8.8%)                  | 4,642 (8.8%)                  |                |
| Aug                         | 4,947 (8.7%)                  | 4,622 (8.3%)                  | 4,779 (9.1%)                  |                |
| Sep                         | 4,669 (8.2%)                  | 4,624 (8.3%)                  | 4,302 (8.2%)                  |                |
| Oct                         | 4,609 (8.1%)                  | 4,660 (8.4%)                  | 4,314 (8.2%)                  |                |
| Nov                         | 4,586 (8.1%)                  | 4,368 (7.9%)                  | 3,993 (7.6%)                  |                |
| Dec                         | 4,784 (8.4%)                  | 4,564 (8.2%)                  | 4,626 (8.8%)                  |                |
| <b>Priority Description</b> |                               |                               |                               | < 0.01         |
| 1 (MOH 4)                   | 2,001 (3.5%)                  | 2,178 (3.9%)                  | 1,952 (3.7%)                  |                |
| 2 (MOH 4)                   | 22,430 (39.6%)                | 22,524 (40.6%)                | 22,339 (42.5%)                |                |
| 2T                          | 252 (0.4%)                    | 0 (0.0%)                      | 0 (0.0%)                      |                |
| 3 (MOH 3)                   | 17,743 (31.3%)                | 16,510 (29.7%)                | 14,958 (28.5%)                |                |
| 3T EMERG TRANSFER           | 1,537 (2.7%)                  | 1701 (3.1%)                   | 1,528 (2.9%)                  |                |
| 4 (MOH 2)                   | 1,187 (2.1%)                  | 843 (1.5%)                    | 962 (1.8%)                    |                |
| 4T SCHEDULED TRANSFER       | 1,288 (2.3%)                  | 1,272 (2.3%)                  | 861 (1.6%)                    |                |
| 5 (MOH 1)                   | 10,112 (17.8%)                | 10,398 (18.7%)                | 9,851 (18.8%)                 |                |
| 5T NON-URGENT TRANSFER      | 94 (0.2%)                     | 79 (0.1%)                     | 74 (0.1%)                     |                |

---

|           |          |           |           |  |
|-----------|----------|-----------|-----------|--|
| 8 (MOH 8) | 8 (0.0%) | 18 (0.0%) | 11 (0.0%) |  |
|-----------|----------|-----------|-----------|--|

---

**eTable 2: Emergency calls serviced by MIH and propensity score matched calls serviced by ambulance**

|                             | <b>MIH</b>      | <b>2018-19</b>  | <b>Ambulance</b> |                 |                |
|-----------------------------|-----------------|-----------------|------------------|-----------------|----------------|
|                             | <b>2018-19</b>  | <b>2018-19</b>  | <b>2017-18</b>   | <b>2016-17</b>  | <b>p value</b> |
|                             | <b>(N=1740)</b> | <b>(N=1740)</b> | <b>(N=1740)</b>  | <b>(N=1739)</b> |                |
| <b>Age</b>                  |                 |                 |                  |                 | 0.82           |
| Mean (SD)                   | 57.9 (24.1)     | 57.3 (25.1)     | 57.3 (25.6)      | 58.0 (25.2)     |                |
| <b>Sex</b>                  |                 |                 |                  |                 | 0.75           |
| Female                      | 896 (51.5%)     | 870 (50.0%)     | 892 (51.3%)      | 918 (52.8%)     |                |
| Male                        | 798 (45.9%)     | 825 (47.4%)     | 808 (46.4%)      | 775 (44.6%)     |                |
| Not recorded                | 46 (2.6%)       | 45 (2.6%)       | 40 (2.3%)        | 46 (2.6%)       |                |
| <b>City</b>                 |                 |                 |                  |                 | 0.78           |
| Fort Erie                   | 47 (2.7%)       | 43 (2.5%)       | 49 (2.8%)        | 48 (2.8%)       |                |
| Grimsby                     | 33 (1.9%)       | 22 (1.3%)       | 45 (2.6%)        | 33 (1.9%)       |                |
| Haldimand                   | 0 (0.0%)        | 0 (0.0%)        | 1 (0.1%)         | 0 (0.0%)        |                |
| Lincoln                     | 33 (1.9%)       | 28 (1.6%)       | 25 (1.4%)        | 39 (2.2%)       |                |
| Niagara Falls               | 366 (21.0%)     | 380 (21.8%)     | 393 (22.6%)      | 381 (21.9%)     |                |
| Niagara-On-The-Lake         | 55 (3.2%)       | 64 (3.7%)       | 60 (3.4%)        | 63 (3.6%)       |                |
| Pelham                      | 26 (1.5%)       | 23 (1.3%)       | 21 (1.2%)        | 25 (1.4%)       |                |
| Port Colborne               | 14 (0.8%)       | 13 (0.7%)       | 20 (1.1%)        | 11 (0.6%)       |                |
| St Catharines               | 908 (52.2%)     | 884 (50.8%)     | 872 (50.1%)      | 880 (50.6%)     |                |
| Thorold                     | 108 (6.2%)      | 114 (6.6%)      | 102 (5.9%)       | 119 (6.8%)      |                |
| Wainfleet                   | 0 (0.0%)        | 1 (0.1%)        | 0 (0.0%)         | 1 (0.1%)        |                |
| Welland                     | 144 (8.3%)      | 160 (9.2%)      | 147 (8.4%)       | 136 (7.8%)      |                |
| West Lincoln                | 6 (0.3%)        | 8 (0.5%)        | 5 (0.3%)         | 3 (0.2%)        |                |
| <b>Month</b>                |                 |                 |                  |                 | 0.77           |
| Jan                         | 144 (8.3%)      | 135 (7.8%)      | 129 (7.4%)       | 132 (7.6%)      |                |
| Feb                         | 155 (8.9%)      | 155 (8.9%)      | 127 (7.3%)       | 172 (9.9%)      |                |
| Mar                         | 135 (7.8%)      | 159 (9.1%)      | 149 (8.6%)       | 130 (7.5%)      |                |
| Apr                         | 193 (11.1%)     | 189 (10.9%)     | 189 (10.9%)      | 195 (11.2%)     |                |
| May                         | 215 (12.4%)     | 200 (11.5%)     | 190 (10.9%)      | 197 (11.3%)     |                |
| Jun                         | 220 (12.6%)     | 215 (12.4%)     | 239 (13.7%)      | 216 (12.4%)     |                |
| Jul                         | 116 (6.7%)      | 129 (7.4%)      | 134 (7.7%)       | 126 (7.2%)      |                |
| Aug                         | 114 (6.6%)      | 96 (5.5%)       | 115 (6.6%)       | 119 (6.8%)      |                |
| Sep                         | 76 (4.4%)       | 70 (4.0%)       | 81 (4.7%)        | 82 (4.7%)       |                |
| Oct                         | 100 (5.7%)      | 114 (6.6%)      | 104 (6.0%)       | 101 (5.8%)      |                |
| Nov                         | 139 (8.0%)      | 123 (7.1%)      | 148 (8.5%)       | 140 (8.1%)      |                |
| Dec                         | 133 (7.6%)      | 155 (8.9%)      | 135 (7.8%)       | 129 (7.4%)      |                |
| <b>Priority Description</b> |                 |                 |                  |                 | 0.14           |
| 1 (MOH 4)                   | 50 (2.9%)       | 47 (2.7%)       | 37 (2.1%)        | 57 (3.3%)       |                |
| 2 (MOH 4)                   | 91 (5.2%)       | 86 (4.9%)       | 88 (5.1%)        | 93 (5.3%)       |                |
| 3 (MOH 3)                   | 775 (44.5%)     | 813 (46.7%)     | 785 (45.1%)      | 781 (44.9%)     |                |
| 4 (MOH 2)                   | 105 (6.0%)      | 102 (6.0%)      | 109 (6.2%)       | 99 (5.7%)       |                |
| 5 (MOH 1)                   | 718 (41.3%)     | 690 (39.7%)     | 721 (41.4%)      | 708 (40.7%)     |                |
| 8 (MOH 8)                   | 1 (0.1%)        | 0 (0.0%)        | 0 (0.0%)         | 1 (0.1%)        |                |
